# 1     **Structure-based prediction of Ras-effector binding affinities and design of** 2                                    **‘branchegetic’ interface mutations**

3  
4

5                                    Philipp Junk <sup>2,3\*</sup>, Christina Kiel <sup>1,2,3</sup>

6  
7     **Affiliations**

8     <sup>1</sup> Department of Molecular Medicine, University of Pavia, 27100 Pavia, Italy

9     <sup>2</sup> Systems Biology Ireland, School of Medicine, University College Dublin, Dublin 4, Ireland.

10    <sup>3</sup> UCD Charles Institute of Dermatology, School of Medicine, University College Dublin,  
11    Dublin 4, Ireland

12

13    \*Correspondence: Philipp Junk ([philipp.junk@ucdconnect.ie](mailto:philipp.junk@ucdconnect.ie))

14

## 15    **Summary**

16    Ras is a central cellular hub protein controlling multiple cell fates. How Ras interacts with a  
17    variety of potential effector proteins is relatively unexplored, with only some key effectors  
18    characterized in great detail. Here, we have used homology modelling based on X-ray and  
19    AlphaFold2 templates to build structural models for 54 Ras-effectors complexes. These models  
20    were used to estimate binding affinities using a supervised learning regressor. Furthermore, we  
21    systematically introduced Ras ‘branch-pruning’ (or branchegetic) mutations to identify 200  
22    interface mutations that affect the binding energy with at least one of the model structures. The  
23    impacts of these branchegetic mutants were integrated into a mathematical model to assess the  
24    potential for rewiring interactions at the Ras hub on a systems level. These findings have  
25    provided a quantitative understanding of Ras-effector interfaces and their impact on systems  
26    properties of a key cellular hub.

27

## 28    **Keywords**

29    AlphaFold, branch pruning, edgetics, enedgetics, effectors, FoldX, homology modelling, hub,  
30    networks, Ras

31

## 32 **Introduction**

33 Ras is a key cellular signaling hub and oncogene<sup>1</sup>. The first correct Ras structure was famously  
34 described in 1989<sup>2 3</sup> and consists of the G domain super-fold (six  $\beta$ -strands and five  $\alpha$ -helices;  
35 <sup>1</sup>). It's main structural and functional characteristic is the nucleotide binding site (the typical  
36  $\alpha,\beta$ -fold of nucleotide binding proteins), which can bind GTP and hydrolyze it to GDP. Then,  
37 GDP gets released and a new nucleotide (favorably GTP since it is higher abundant in cells)  
38 gets bound. Depending on which nucleotide is bound, the functional state of RAS is different.  
39 GDP bound Ras assumes a so-called inactive conformation, whereas upon the binding of GTP,  
40 the conformation of Ras is called active. The difference between the active and the inactive  
41 conformation is that, in the active conformation, two loop regions called switch 1 and switch 2  
42 are interacting with the GTP and thereby tightly bound to it<sup>1</sup> (Figure 1A). This rearranges the  
43 interface of Ras in a specific way so that effector proteins with a specific structural motive can  
44 interact with Ras. The structural motive required for the interaction with Ras has a ubiquitin  
45 domain super-fold<sup>4</sup>. There exist three families of these domains, called Ras binding domain  
46 (RBD), Ras association domain (RA domain) and PI3K-Ras binding domain (PI3K RBD) with  
47 only minor sequence and structural differences between them. In the following, for the sake of  
48 simplicity, all of these will be called RBDs.

49 Ras·GTP can interact and activate many downstream effectors, some of which are better  
50 studied than others<sup>5</sup>. Well-studied effectors include PI3-kinases, RalGDS, and Raf kinases,  
51 which control important cellular processes such as survival, polarization, adhesion, migration,  
52 and proliferation. In our previous work, we characterized a set of 56 RBD-containing proteins  
53 as potential Ras effectors, which converge into 12 classes that are linked to different  
54 downstream cellular processes and phenotypes<sup>6 7 8 9</sup>.

55 Ras-effector interactions are interesting from a systems biology and network point of  
56 view. Effectors use a mutually exclusive binding site on Ras, hence competition for binding  
57 can occur under certain conditions<sup>10</sup>. Also, the experimental and predicted affinities between  
58 RBDs and Ras·GTP vary, ranging from nano- to micromolar  $K_d$  values<sup>8</sup>. Previously we  
59 analyzed how the amount of effectors in complex with Ras varies in different cell types<sup>6 7</sup>. We  
60 find that only 9 effectors are predicted to bind in significant amount to Ras·GTP using the RBD  
61 alone<sup>7</sup>. However, 31 effectors are predicted to form significant complexes with Ras if they are  
62 additionally recruited to the plasma membrane via other domains present in effectors  
63 (piggyback mechanism,<sup>11</sup>). Hence, even weak binding affinities on the level of RBD-RAS  
64 binding can turn into significant complex formation if effectors are recruited (e.g. in a context

65 specific manner). Thus, for systems analyses and computational models, we need good  
66 estimations for all binding affinities between RBDs and Ras.

67 Structural analysis can lead to a deeper understanding of protein-protein interaction  
68 (PPI). Previous we used homology modelling, based on experimentally determined complex  
69 structures, to predict binding between effectors and Ras·GTP<sup>12 13</sup>. While this has provided  
70 insights into binding propensities, a limitation of this work was that no quantitative binding  
71 affinities were predicted, but qualitative binding by classifying effectors into categories of  
72 ‘binding’, ‘non-binding’, and ‘twilight’. It is now timely to revisit homology modelling of Ras-  
73 RBD complexes, as new template structures are available by (i) X-ray crystallography (8 of 56  
74 effectors are crystallized in complex with RAS) and (ii) AlphaFold<sup>14 15</sup>.

75 Ras is frequently mutated in different cancers, where aberrant Ras signaling plays a role  
76 in cancer initiation, progression, and metastasis via alterations in metabolism, proliferation, and  
77 survival<sup>16</sup>. As Ras cannot be directly targeted (or only certain Ras mutations)<sup>17</sup>, much hope  
78 rests on network-centric approaches<sup>18</sup> that involve Ras-effector interactions or downstream  
79 pathways<sup>9</sup>. Therefore, tinkering with Ras-effector binding is an attractive alternative strategy  
80 for finding suitable targets for therapeutic interventions. Previously we developed a ‘branch-  
81 pruning’ (or “branchegetic”, in analogy to “edgetics”<sup>19</sup> and “enedgetics”<sup>20</sup>) strategy for Ras  
82 effector interactions, where mutations are introduced into Ras that differentially impact binding  
83 to effectors<sup>21</sup>. For example, introducing a mutation can result in a steric clash in the interface  
84 formed with one effector, but not with another; hence the interaction with one effector is broken  
85 while intact for another.

86 In this work, we first generate homology models of all Ras-effector (RBD) interactions  
87 and predict affinities of the RBDs in complex with Ras·GTP. We then use the generated model  
88 structures to employ a systematic branchegetic strategy that explores the impact of Ras interface  
89 mutants on binding to all effectors. Altogether, our results contribute to a quantitative and  
90 systems-level understanding of Ras-effector interactions and further our understanding of Ras  
91 in health and disease.

92

93

## 94 **Results**

### 95 **Structural analysis of experimental complex structures**

96 From the few experimentally determined complex structures of Ras with these RBDs, there are  
97 some structural similarities that can be determined (Figure 1). The main interface on the site of  
98 Ras consists of the two switch regions, switch 1 and switch 2. One of the main structural features

99 of the interface between Ras and RBDs is the formation of an intra-molecular  $\beta$ -sheet between  
100  $\beta 2$  on RAS and  $\beta 2$  on the RBD. This interaction is a highly conserved structural feature across  
101 all available complex structures, with deviations in orientation of less than 1 Å (Figure 1B, see  
102 Methods for MAE).

103 Analyzing the energetic profile of the interface *in silico* using the FoldX force field  
104 shows that there are also some recurring hotspots in the interface (highlighted in Figure 1C).  
105 I36, D38 and Y40 are well characterized as important residues for the interaction between Ras  
106 and effector domains. Additionally, for the structures 3DDC and 1LFD, the mutation E31K was  
107 introduced to stabilize the complex for crystallization. Our analysis confirms that this interface  
108 mutation has indeed been favorable for the complex formation. Finally, the energetic  
109 contributions of the function regions switch 1 and 2 to the interface were analyzed. Both relative  
110 and absolute contributions are diverse, although switch 1 contributions to binding dominate  
111 (Figure 1D). Altogether, the analysis of existing Ras-RBD effector structures indicates that  
112 although there are many common features of the Ras RBD interface such as the intra-molecular  
113  $\beta$ -sheet or the hydrophobic patch around I36, the actual energetic contributions can come from  
114 different parts of the interface. It also sets the basis for a successful homology modelling  
115 approach.

116

### 117 **Homology modelling and characterization of modelled interfaces**

118 In order to study these interface features in a more diverse set of structures, homology models  
119 of the complex between RAS and RBD were constructed for all proteins containing an RBD in  
120 the human proteome.

121 The homology modelling pipeline is based on the already existing complex models  
122 (Table S1). Also, with the recent release of AlphaFold2<sup>14</sup> and the accompanying AlphaFold  
123 Protein Structure Database<sup>15</sup>, the RBD domains of all potential effectors were extracted from  
124 that database and used. The structures of RBDs are predicted with good confidence by  
125 AlphaFold2 and our analysis indicates that AlphaFold2 is reliable at predicting the RBD fold  
126 (Figure S1). Additionally, AlphaFold2 complex modelling was attempted for all potential  
127 complex structures and models which AlphaFold2 were confident in (by Predicted Alignment  
128 Error (PAE)) and where the  $\beta$ -sheet alignment of the interface was within a tolerance to what  
129 has been observed in crystal structures, were used as templates as well (Figure S2 and S3,  
130 compare MAE Figure 1). There are two kinds of templates to use: 1) complex templates which  
131 comprised of the already experimentally determined complex structures of Ras and RBDs, as  
132 well as “good” AlphaFold2 predicted complex templates (Table S1), and 2) templates of the

133 RBDs alone which were extracted from the AlphaFold2 Protein Structure Database (Table S2).  
134 An overview over the pipeline is depicted in Figure 2. Homology modelling was performed  
135 using homelette<sup>22</sup> with modeller and altMod<sup>23-25</sup>. Evaluation of predicted structures was  
136 performed using QMEAN, MolProbity and SOAP potentials<sup>26-29</sup>. The top 300 models for each  
137 target for each source of complex templates (experimental or AlphaFold2) were selected by  
138 combining the different scores. Subsequently, analysis using FoldX (interaction energy and  
139 alanine scan) was performed.

140 In order to evaluate our approach, we generated a validation set, in which we created  
141 models for the structures already solved by X-ray crystallography without using information  
142 from the specific structure. Models generated in this validation set were compared to the  
143 underlying ground truth by assessing their correlation of the *in silico* alanine scan results to  
144 those of the crystal structures of interest. Using this ground truth, different methods to select  
145 representative models from the hundreds of structures were assessed. In particular, we evaluated  
146 the hyperparameters of an unsupervised learning pipeline comprised of different feature  
147 selection and dimensionality reduction strategies followed by clustering with the OPTICS  
148 algorithm (see Methods for more details about the hyperparameter space). After clustering,  
149 three representative structures were chosen. Based on the performance in the validation set, the  
150 optimal set of hyperparameters was chosen (Table S3, see Figures S4). The described strategy  
151 for identifying representative structures was then applied to all target complexes and we ended  
152 up with three representative complex structures for each effector.

153 Analogous to how we characterized the interfaces of the experimentally determined  
154 complex structures before, we performed the same analysis on the complex models. The overall  
155 FoldX interaction energies for the models are diverse, indicating that maybe some of the  
156 complexes are energetically unfavorable and would not form (Figure S5B). In general, the  
157 binding energies are lower than what would be observed in crystal structures, which is to be  
158 expected. There are one or two outliers with regards to FoldX binding energy, namely RASSF8  
159 and PIK3C2B. In particular, RASSF8 is also showing an uncommon hotspot profile, with  
160 multiple unfavorable hotspots that are only appearing for this set of structures (Figure S5A).  
161 Based on this behavior, RASSF8 is excluded from further analysis.

162 The analysis of hotspots confirmed the already established hotspots. I36, Y40, D38 and  
163 E37 are the most commonly observed hotspots (Figure 3AB, Figure S5A). Interestingly, while  
164 I36, Y40, and E37 are exclusively favorable to the interaction with the effector protein, D38  
165 seems to be also unfavorable in some of the structures (Figure 3B). The energetic diversity of  
166 the hotspot D38 was further investigated in the models. For this, two models were picked for

167 which D38 was a favorable hotspot in the alanine scan analysis (Figure 3C: RASSF1, Figure  
168 3D: RGL3), and two models were picked for which it was unfavorable (Figure 3E: ARAP2,  
169 Figure 3F: RAPGEF3). Next, neighboring amino acids were analyzed. For favorable  
170 interactions, we were able to observe positively charged amino acids. On RASSF1, we find  
171 K216 and H217, whereas on RGL3, there is R630. These amino acids probably form strong  
172 interactions with the negatively charged D38 on Ras. In contrast, for the models where D38  
173 comes up as an unfavorable hotspot in the interface, we observe an uncharged, mostly  
174 hydrophobic neighborhood.

175

### 176 **Estimation of binding energies**

177 One of the applications of the structural models that were generated was to use them for the  
178 estimation of binding energies. Since experiments measuring the binding energy between two  
179 proteins are experimentally very challenging and error-prone<sup>30</sup>, we were implementing an *in*  
180 *silico* approach. Also, while FoldX is good at predicting energy changes to interaction energy  
181 or protein stability on mutation, the absolute interaction energies for protein complexes usually  
182 are not well correlated with experimental values<sup>31</sup>. Because of this, a supervised learning  
183 regression pipeline was built based on features extracted from the modelled structures and a  
184 collection of experimentally determined binding energies of different Ras-effector complexes  
185 (Table S5). From a combination of different regressors, feature selection procedures, and  
186 hyperparameters, the best approach was determined using a cross validation strategy (see  
187 methods). A support vector machine-based regressor (see hyperparameters in Table 4)  
188 performed best in cross-validation with an R2 score of 0.53. Then, the performance of the best  
189 approach was evaluated in an out-of-sample test set, where it achieved an R2 score of 0.77. The  
190 model was then used to predict the interaction energies for the complexes without prior  
191 experimental measurements (Figure 4, Table S5). The predicted binding affinities for our  
192 models range 4 orders of magnitude, between the highest predicted affinity for BRAF of 0.02  
193  $\mu\text{M}$  to PIK3C2B with the lowest predicted affinity of 588  $\mu\text{M}$ . The highest binding effectors  
194 are quite well characterized (RAF family, PI3K, RASSF5, RIN1, RalGDS, AFDN<sup>8</sup>). As  
195 experimental measurements of the PI3K family members are difficult as the RBD is not easy  
196 to express and purify in isolation, it is noteworthy that we assign three of the good binding  
197 affinities to PI3K family members (PIK3CA, PIK3CD, PIK3CG). A big group of effectors has  
198 affinities in the range of 1 to 10  $\mu\text{M}$ . For example, RASIP1 was previously in the “likely no  
199 binding” category<sup>8</sup>, and is now predicted<sup>8</sup> to have an affinity in complex with Ras of 2.7  $\mu\text{M}$ .  
200 RAPGEF5 and RGL3 were previously in the “unknown”<sup>8</sup> category and have predicted



201 affinities of 9.2 and 5.6  $\mu\text{M}$ , respectively. Another big group of effectors has affinities in the  
202 range of 10 to 100  $\mu\text{M}$ . Especially the first one could be interesting for modulation of binding  
203 affinity by the piggy back mechanism <sup>7</sup>.

204

### 205 **Switch contributions to binding**

206 Having Ras-effector structural models available allowed us to analyze the individual  
207 contributions of switch 1 and switch 2 to binding using the results from alanine scanning  
208 (similarly as done before for the X-ray Ras-effector structures). We find that generally most  
209 structures are dominated by favorable switch 1 contributions (Figure 5 and Figure S6). Switch  
210 2 contributions are surprisingly small. We also predict more contributions from regions outside  
211 switch 1 and switch 2 as in the X-ray structures. For the two weak affinity binding groups (10  
212  $\mu\text{M}$  ( $K_d < 100 \mu\text{M}$  and ( $K_d > 100 \mu\text{M}$ ) switch 1 contributions are in the range of 4 to 5 kcal/mol  
213 with small ( $\sim 1$  kcal/mol) contributions from switch 2 and remaining parts involved in interface  
214 formation. For the two strong affinity groups ( $K_d < 1 \mu\text{M}$  and  $1 \mu\text{M}$  ( $K_d < 10 \mu\text{M}$ ) switch 1  
215 contributions increase to 6 to 9 kcal/mol with also increasing switch 2 contributions (1 to 2  
216 kcal/mol). We also observed negative switch contributions (mainly for switch 1), indicating  
217 that these proteins are either not well predicted or non-binders. Indeed, all structures with  
218 negative switch energies are predicted to be weak binders.

219

### 220 **Branch pruning analysis using Ras-effector model structures**

221 Next, we were interested in exploring surface mutations on Ras that would selectively influence  
222 the binding to some, but not all effectors. Both enhancing and inhibiting mutations are of  
223 interest. This could enable the engineering of the Ras effector system to respond to stimuli in  
224 different ways and to study selective sets of effectors. We previously reported a framework for  
225 the identification and evaluation of so called ‘branch pruning’ mutations <sup>21</sup>. Since our protein  
226 is interacting with a many different effectors at the same time through the same interface it will  
227 be quite unlikely to identify mutations that selectively target only one protein. Instead, it is more  
228 likely that we will identify mutations that enhance in interaction with some proteins while  
229 inhibiting some others.

230 Figure 6 shows a heatmap of all identified mutations of interest and their effect on all  
231 effectors. Some interesting mutations to highlight are mutations around I36, that are almost  
232 exclusively unfavorable while affecting almost every structure. D37 mutation are more  
233 selective and also exclusively disruptive. D38 is mixed, as our analysis of the hotspot already  
234 indicated. This is probably the best point to disrupt the system. Y40, interestingly, while being

235 a ubiquitous hotspot, is not a good spot for engineering the interface because mutations seem  
236 to affect protein stability (compare with Figure S7A). Also of interest is that we detect both  
237 mutations that increase and disrupt binding (Figure S7B).

238

### 239 **Assessment of rewiring of Ras-effector interaction on a systems level**

240 Finally, we want to evaluate the behavior of the Ras effector system based on our predicted  
241 binding energies and based on the introduction of different branch pruning mutations. For this  
242 means, we went back to our mathematical model of the Ras-effector system that incorporated  
243 affinities and high-quality proteomics data in 29 human tissues <sup>7</sup>. Here, all 29 tissue systems  
244 were simulated at 20% and 90% GTP load on Ras. We are using exclusively the predicted  
245 binding energies for this (except RASSF8, see methods). Overall, the results for the systems  
246 without a branch pruning mutation are comparable to previous findings (Figure 7A; <sup>7</sup>). The Raf  
247 family members ARAF, BRAF and RAF1 dominate the binding profile in complex with Ras.  
248 Other effectors that are in high amount in complex with Ras in at least one of the 29 tissues are  
249 RGL2, RASSF7, RASSF5, RASIP1, RALGDS, PIK3CD, PIK3CA, and AFDN.

250 Expanding on this, we introduced our branch pruning mutations to the mathematical  
251 model. In total, there are 200 interface mutations that do not significantly affect overall protein  
252 stability but affect binding to at least one of the effectors. Some of the branch pruning mutations  
253 are able to dramatically change the system in all tissues, as can be seen from the example of  
254 D38A (Figure 7B). With a single interface mutation, almost all RAF binding is quenched, and  
255 other effectors start to compete for the binding. Interestingly, which effectors come up depends  
256 on the tissue.

257 Next, we explored to which extend, for a specific effector, it is possible to modulate its  
258 binding. For this, we visualized the possible changes to the relative amount of effector bound  
259 to Ras across all systems tested (Figure 7C). On the side of proteins that can be negatively  
260 influenced, mostly the high-affinity binders such as RAF family proteins show up, which is to  
261 be expected. Some effectors cannot be influenced by the branch pruning mutations, either  
262 because they are energetically not affected or because their concentrations in any of the 29  
263 tissues do not leave them in a position to compete for binding. Examples for this would be  
264 RADIL or the TIAM family proteins. The effectors with the highest propensity to have their  
265 binding enhanced are AFDN, RADIL, SNX27, RASSF5.

266 Finally, we investigated whether there are recurring states that the modelled system  
267 assumes and whether these states are dependent on Ras-GTP load, the tissue, or interface  
268 mutation. To this end, we applied uniform manifold approximation and projection (UMAP) to



269 our systems to transform a high-dimensional space of absolute and relative effector binding into  
270 a 2D space. Then, we used OPTICS to identify areas of high density in this 2D plane and  
271 assigned them into 24 distinct clusters as well as outliers outside the clusters (Figure 8A). For  
272 each cluster, we picked three of the systems at random and visualized their relative effector  
273 binding (Figure S8). Each of these clusters belongs to a different “state” that the Ras-effector  
274 system can be rewired into, with systems belonging to a specific state showing similar trends  
275 in effector binding. Many of the systems are dominated by ARAF binding, as it would be  
276 expected, but even for these there are differences in the secondary effectors. To understand  
277 what the attributes of different “states” of the systems are, two of them were picked and  
278 investigated for Ras-GTP load, tissue composition, and interface mutation status (Figure 8BC).  
279 We find that there are different ways a distinct state of the system can come together: for the  
280 state analyzed in Figure 8B, we can see that it is composed of many different tissues, but only  
281 a handful of interface mutations, most of them D38 mutations. This indicates that this state can  
282 be reached from many different tissues by a specific, recurring set of mutations. In contrast, the  
283 state analyzed in Figure 8C is entirely composed of a single tissue (lymph node) with many  
284 different mutations, indicated that this state can only be reached by a specific tissue.  
285 Interestingly, both states analyzed are diverse in terms of Ras-GTP load. To conclude, we  
286 identify 24 distinct states of the Ras-effector systems and show that there are different  
287 mechanisms on how these states are formed.

288 In summary, based on a large set of Ras-effector models, we predicted Ras branch genetic  
289 mutations and evaluate their binding in a tissue-specific Ras competition model. The Ras  
290 mutations, once introduced into cells or tissues, can be used as a tool to probe the contribution  
291 of specific effector pathways to an output or cellular phenotype.

292

293

## 294 **Discussion**

295 In this work we have shown a complete structural reconstruction of Ras and the RBDs of its  
296 effectors based on state-of-the-art technology. We used these structural models to investigate  
297 the workings of the interface between Ras and its effectors, as well as to search for and identify  
298 potential branch pruning mutations on Ras that would alter the behavior of the underlying  
299 system. We analyzed the effects on the steady state of the Ras effector system.

300 Recent advances in structural modelling, mostly by the development and release of  
301 AlphaFold2 and similar algorithms have pushed the field of structural bioinformatics forward.  
302 This development was crucial for the quality of this study. While a normal homology modelling

303 pipeline would have been successful, the inclusion of both aspects of AlphaFold2 models was  
304 essential for the quality of the results. On the one hand, finding additional potential complex  
305 templates diversified the possible configurations of the interface that we could use to generate  
306 our models. On the other hand, having high quality templates of the RBDs enabled us to  
307 improve the structural predictions. Interestingly, with all the advancements that AlphaFold2  
308 brought, this combined AlphaFold2/homology modelling approach yielded more consistent and  
309 better results for this particular question.

310         There is a growing body of literature about how Ras dimerizes or forms multimers, or  
311 interacts with the membrane to modulate the signaling. All these aspects have been deliberately  
312 left out for this approach. The essence of the interaction of Ras and its effectors is the binary  
313 protein-protein interaction between the Ras switch regions and the RBD. This common feature  
314 was the focus of this work, and we believe that other factors such as dimer/multimerization of  
315 Ras, the composition of the membrane, etc., are only modulators for this interaction.

316         By creating a complete structural system, we were able to investigate and understand  
317 the interactions of Ras with its effector proteins on a different level. Crucially, it enabled us to  
318 analyze how *in silico* mutations of the system could affect its behavior. This is an interesting  
319 approach for a lot of different systems, not just the Ras effector system. However, there are  
320 certainly challenges. The prediction and verification of a protein-protein interface can be very  
321 complicated, and the techniques for modelling protein-protein interactions are not sufficiently  
322 developed to easily translate that approach to a larger scale. Probably the main reason why it  
323 was possible to construct this structural system for the Ras-effector system was because it is a  
324 conserved domain-domain interaction between homologue proteins. Although the sequence  
325 identity of the RBD sequences is not well preserved anymore, the structural fold of these  
326 domains has been preserved. Additionally, there is also the preserved mode of binding by the  
327 formation of the intermolecular  $\beta$ -sheet. These factors were favorable for the construction of  
328 the structural system and would need to be addressed if this approach were to be taken to a  
329 higher scale. Recent publications are already able to work on system-wide structural prediction  
330 for interactions<sup>32</sup>. These approaches are very promising for the structural characterization of  
331 known protein complexes and can identify high-confidence novel interactions as well.  
332 However, for the exhaustive characterization of a full system, especially with transient  
333 interactions, the distinction between true and false positives seems to remain challenging.

334         Finally, we hope that our structural and systems analysis of the branch pruning interface  
335 mutations will enable interesting experimental setups that study different downstream pathways  
336 from Ras. Some of the more promising candidates are AFDN, RADIL, SNX27, RASSF5. The

337 downstream pathways of Ras that are best characterized are the RAF-MEK-ERK signaling  
338 pathway and the PI3K-AKT signaling pathway. However, some of the other proteins might  
339 play a role in a physiological or pathophysiological context as well. AFDN is essential for the  
340 organization of adhesion between cells<sup>33</sup>, function that is often impaired in cancer<sup>34</sup>. RADIL  
341 is also linked to cell adhesion, and recent data showed that knockdown of was linked to  
342 decreased cell proliferation and invasion<sup>35</sup>. SNX27 is also part of signaling pathways that link  
343 to cell adhesion and barrier function<sup>36</sup>. RASSF5 is a tumor suppressor and has been shown to  
344 inhibit growth and invasion and to induce apoptosis<sup>37</sup>. Importantly, all branchegetic mutations  
345 were studied on a systems level using a tissues specific Ras competition model. These models  
346 can easily be adapted for specific cell systems of interest, provided that estimates for Ras and  
347 effector abundances are available. Altogether, this work contributed to a quantitative  
348 understanding of a key cellular hub protein – Ras.

349

350

### 351 **Acknowledgements**

352 The authors would like to thank Cian D’Arcy, Thomas Sevrin, Simona Catozzi, Swathi  
353 Ramachandra Upadhya, and Hiroaki Imoto for discussions and/or critical reading of the  
354 manuscript.

355 This work is part of the research program “Quantitative and systems analysis of  
356 (patho)physiological signaling networks” [16/FRL/3886], which is financed by Science  
357 Foundation Ireland (SFI) to C.K.

358 This publication has emanated from research conducted with the financial support of Science  
359 Foundation Ireland under Grant number [16/FRL/3886]. For the purpose of Open Access, the  
360 author has applied a CC BY public copyright licence to any Author Accepted Manuscript  
361 version arising from this submission.

362

### 363 **Author contributions**

364 Conceptualization, P.J. and C.K.; Methodology, P.J. and C.K.; Software, P.J.; Investigation,  
365 P.J.; Data Curation, P.J.; Writing – Original Draft, P.J. and C.K.; Writing – Review & Editing,  
366 P.J. and C.K.; Visualization, P.J. and C.K.; Supervision, C.K.; Funding Acquisition, C.K

367

### 368 **Declaration of interests**

369 The authors declare no competing interests.

370

## 371 **STAR★Methods**

### 372 **Lead contact**

373 Further information and requests for resources should be directed to Philipp Junk and will be  
374 fulfilled by the lead contact, Philipp Junk ([philipp.junk@ucdconnect.ie](mailto:philipp.junk@ucdconnect.ie))

375

### 376 **Material availability**

377 This study did not generate new unique reagents.

378

### 379 **Data and Code availability**

380 The code and generated data have been deposited on Zenodo:  
381 <https://doi.org/10.5281/zenodo.7188727>

382

## 383 **METHOD DETAILS**

### 384 **Experimentally determined Ras-effector complex structures**

385 Structures were downloaded from the PDB. In the case where multiple models were available,  
386 the best one by MolProbity score was selected<sup>27 28</sup>. The PDB files were processed using pdb-  
387 tools so that all GTP and Mg2+ annotations were in the expected format<sup>38</sup>. The list of used  
388 template structures can be found in Table S1.

389

### 390 **Interface characterization**

391 Hotspots residues were determined by FoldX *in silico* Alanine scan<sup>39 31 20 40 41</sup>. In detail, each  
392 residue on both RAS and the effector was mutated to alanine and the *in silico* change of binding  
393 energy  $\Delta\Delta G$  was determined as such:

$$394 \quad \Delta\Delta G_{\text{alascan}} = \Delta G(\text{mut}) - \Delta G(\text{wt})$$

395 A positive  $\Delta\Delta G$  value indicates that the mutated residue is involved favorably in the interaction,  
396 whereas a negative  $\Delta\Delta G$  value indicates that the mutation to alanine improved the interaction  
397 between the two proteins. The standard error for  $\Delta\Delta G$  values in FoldX is around +/- 0.8 kcal/mol.  
398 In order to identify the most important residues for the respective interaction, a  $\Delta\Delta G$  cut-off of  
399 1.6 kcal/mol was chosen for the investigation of crystal structures. Since the energies are  
400 systematically lower in the modelled complex structures, a cut-off of 1.2 kcal/mol was chosen  
401 for those.

402 Based on the alanine scan results, the contribution of the two major functional regions  
403 in the RAS interface <sup>42</sup>, switch 1 (residues 20-42) and switch 2 (residues 56-76) to the  
404 interaction were determined. For each functional region and the remainder of Ras, the  $\Delta\Delta G$   
405 values were filtered by  $\text{abs}(\Delta\Delta G) > 0.8$  kcal/mol and then summed up. The definition of the  
406 switch regions used here is more generous than what is normally used in the literature, and it  
407 would be probably more correct to label them as “switch-influenced” regions. These residue  
408 ranges aim to capture the regions in the interface that are affected by the movement of switch  
409 1 and 2 during the transition from the inactive GDP bound state to the active GTP bound state.  
410 The conserved intra-molecular  $\beta$ -sheet between the  $\beta 2$  sheet on Ras with the  $\beta 2$  sheet on the  
411 effector is evaluated by measuring the differences in inter-molecular distances between the  $\beta$   
412 sheets in the experimentally solved complex structures and comparing them to the ones in a  
413 structure of interest. This measurement has been named Measured Alignment Error (MAE) in  
414 this manuscript:

$$415 \quad MAE(res_{eff}, res_{ras}) = \frac{\sum_{i=1}^n \sqrt{(dist_{model} - dist_{ref})^2}}{n}$$

416 with  $dist_{model}$  being the Euclidean distance between two residues in the model of interest;  
417  $dist_{ref}$  being the Euclidean distance between the residue on Ras and the corresponding residue  
418 in the reference structure, as determined by structural alignment using TMalign <sup>43</sup>; and  $n$  being  
419 the number of reference structures. The references used were the X-ray complex templates  
420 found in the PDB (Table S1). When the MAE is calculated for X-ray complex templates, the  
421 comparison with itself is removed from the calculation.

422

423

#### 424 **AlphaFold2 determined single structures for RBDs**

425 For each protein containing one or more potential RBD sequences as identified in <sup>6</sup>, the full  
426 structure was obtained from the AlphaFold Protein Structure database <sup>14 15</sup> (Release 1, accessed  
427 September 2021). The sequences of the RBDs were obtained from Pfam <sup>44</sup> and UNIPROT <sup>45</sup>.  
428 The part of the structures that correspond to RBD sequences was subsequently extracted from  
429 the AlphaFold2 structures. The list of used templates as well as information about the extracted  
430 RBD domains can be found in Table S2.

431

#### 432 **AlphaFold2 determined complex structures: generation and selection**

433 AlphaFold2-multimer/ColabFold (version 1.3.0) was run on a local computer <sup>46 14 47</sup>. Multiple  
434 sequence alignments were generated from MS2seq <sup>48 49 50 51</sup>. Complex models were generated

435 with HRAS as interaction partner. For each target, five models were generated with additional  
436 template search and five without additional template search<sup>46 52</sup>. The resulting model were  
437 relaxed as per ColabFold defaults<sup>46 53</sup>. For each model, several metrics were evaluated. Firstly,  
438 AlphaFold2's Predicted Alignment Error (PAE) was taken into consideration. PAE is an  
439 estimation of the error of pairwise distances between residues, that can be used to assess how  
440 confident AlphaFold2 is in the inter-domain arrangement of its models. Secondly, FoldX<sup>39 31</sup>  
441<sup>40 41</sup> interaction energies were determined for the complexes as described above. Finally, the  
442 expected orientation of the inter-molecular  $\beta$  sheets was evaluated by MAE. The best model by  
443 MAE was selected for each target, and then all complex structures with a MAE > 1Å were  
444 removed.

445

### 446 **Homology modelling pipeline**

447 Alignment generation, model generation and model evaluation were performed using the  
448 homelette homology modelling interface<sup>22</sup>. Inputs to the homology modelling pipeline were  
449 complex structures of Ras in complex with some effectors, either experimentally determined or  
450 selected from AlphaFold2 complex predictions, as well as AlphaFold2 models of all RBDs of  
451 interest. For each target, all combinations of the RBD template with all complex templates were  
452 used to generate 300 models of the target in complex with HRAS each. The different sources  
453 for the complex templates were run separately with slight differences in the modelling  
454 procedure. All sequence alignments for RAS were generated with M-Coffee<sup>54,55</sup>. For complex  
455 templates of experimental origin, TMalign<sup>43</sup> was used to generate a structure-based sequence  
456 alignment based on the RBD in the complex template and the single RBD of the target structure.  
457 Then, with those two templates as inputs, models were generated. For complex templates of *in*  
458 *silico* origin, structure-based sequence alignments were generated with TMalign<sup>43</sup> as described.  
459 As an additional template a HRAS single structure (5P21<sup>3</sup>) was used in the modelling process  
460 since the AlphaFold2-generated complex templates, in contrast to the complex templates of  
461 experimental origin, do not have information about the important heteroatoms GTP and MG2+  
462 in the Ras part of the structure. Models were generated using modeller<sup>23 24</sup> with the altMOD  
463 extension<sup>25</sup>. All models generated were evaluated using QMEAN<sup>26 56</sup>, MolProbity,<sup>27 28</sup> and  
464 SOAP<sup>29</sup> potentials. A combined score was determined based on borda count as such:

465

$$\text{combined score}(X) = \sum_{i=1}^m n - \text{rank}_i(X)$$



466 For an observation X with  $i \dots m$  being a collection of evaluation criteria and  $n$  the total number  
467 of observations. A structure with high borda score is a structure that performs well across all  
468 metrics.

469 For each of the different sources of complex templates (experimental or *in silico*), 300 models  
470 were selected in a first selection step based on the combined score. These 600 models per target  
471 were then further analyzed using FoldX. *In silico* interaction energies were determined and *in*  
472 *silico* alanine scan was performed (see Interface Characterization).

473 In addition to generating models for unknown targets, a set of validation models based  
474 on the experimentally solved models were generated as well. For each of the seven PDB  
475 complex structures, 300 models were generated. Inputs were restricted so that the structure to  
476 be modelled would not be used as a complex template, but only the remaining six  
477 experimentally derived complex templates. For each validation target, 300 models were  
478 selected as described above.

479 Using the results from the analysis with FoldX, representative structures were selected  
480 based on an unsupervised learning workflow. As the clustering algorithm of choice, Ordering  
481 Points To Identify the Clustering Structure (OPTICS)<sup>57</sup> was used, as implemented in scikit-  
482 learn<sup>58</sup>. OPTICS is a density-based clustering method, which unlike the more popular k-means  
483 clustering does not require a manually set input of the number of clusters. Additionally,  
484 OPTICS is able to label data points as outliers. Several approaches to feature selection and/or  
485 feature engineering, hyperparameters of OPTICS, as well as methods for selecting  
486 representative structures from clusters were evaluated against the set of validation models  
487 (Table 3). To select the best combination of hyperparameters, for each combination, the *in silico*  
488 alanine scan results of the representative structures were correlated to the results of  
489 corresponding PDB structures, and the combination of hyperparameters with the most stable  
490 performance across all validation sets (by minimum z-score of the correlation against the PDB  
491 structure for all 7 validation sets) was chosen. The best combination of hyperparameters is  
492 highlighted in (Table 3).

493

#### 494 **Estimation of binding energies**

495 Supervised learning based on a number of FoldX-derived features was used in order to estimate  
496 binding energy of complex models. The features consisted of the FoldX interaction energy, the  
497 energy contribution of switch 1, 2 and the remainder of the Ras protein interface (see Interface  
498 characterization), and the  $\Delta\Delta G$  values for hotspot residues on Ras (cut off 1.2 kcal/mol). All

499 features were standardized and highly intercorrelated features were removed. Data preparation  
500 was performed in R.

501 The experimental measurements of the dissociation constant between Ras-effector  
502 complexes were collected from several publications (see Table S5, also available as  
503 supplementary data). Effectors that were experimentally determined as non-binders were  
504 removed from the data set due to uncertainty how to encode them with the varying technical  
505 limitations on detectable binding energies at the time of their publication. Also, the models  
506 generated for RASSF3 seem to be outliers with regards to FoldX interaction energy (see Figure  
507 S5B) and were therefore removed from the prediction. A test set was manually chosen from the  
508 available experimental measurements to cover the full spectrum of experimentally determined  
509 interaction energies. At the end, this gave us a training set with 51 observations (17 \* 3 models)  
510 and a testing set with 12 observations (4 \* 3 models).

511 Supervised learning was performed in scikit-learn <sup>58</sup> using different combinations of  
512 feature selection algorithms and regressors. Feature selection was performed using either f-  
513 regression or mutual information as implemented by scikit-learn. Regression was evaluated for  
514 different algorithms with various hyperparameter spaces (see Table S4). All combination of  
515 feature selection and regression were evaluated using Group-K-Fold cross validation within the  
516 training data, with k=5 and the groups corresponding to the three structural models chosen for  
517 each target. Models were evaluated using R2 score. The best performing combination was  
518 trained on the whole training data and evaluated against the test data. Finally, this model was  
519 used to predict the binding energies for the complex structures without experimental data.

520

### 521 **Branch pruning**

522 FoldX was used to evaluate the effect of interface mutation on the binding energies in the  
523 modelled complex structures. As previously described, <sup>21</sup> the FoldX command PSSM was used  
524 to evaluate the changes in binding energy, and the FoldX command PosScan was used to  
525 evaluate if mutations impacted the stability of RAS.

526 All mutations that were destabilizing HRAS in either of two structures (3TGP and 5P21)  
527 were removed from the analysis (cutoff 1.6 kcal/mol). Then, between the three models for each  
528 target structures, it was checked if a mutation had a noticeable impact (> +- 1kcal/mol) in at  
529 least two of the three structures. If so, the changes in binding energy for all models above/below  
530 the cutoff were averaged.

531

### 532 **Systems analysis**

533 A mathematical model of the Ras-effector system was set up as previously described <sup>6,7</sup>. The  
534 model is based on classic ligand-receptor kinetics according to the assumption of conservation  
535 of mass. A system of ordinary differential equations was set up and steady states were calculated  
536 as described. The reactions are expressed as such:

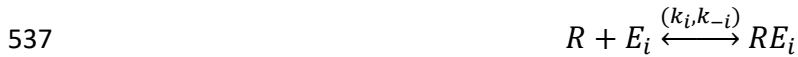

538 With  $R$  representing the molar concentration of Ras,  $E_i$  the molar concentration of an effector  
539 of the set of  $i \in (1, 2, \dots, 54)$  effectors (all modelled proteins, except for proteins from the  
540 Ubiquitin family) and  $RE_i$  the molar concentration of a Ras-effector complexes. The complex  
541 is formed at rate  $k_i$  and dismantled at rate  $k_{-i}$ . These rates define the dissociation constant:

$$542 \quad K_{d_i} = \frac{k_{-i}}{k_i}$$

543 Due to the assumption of mass conservation,

$$544 \quad R_{tot} = R + \sum_1^{54} RE_i$$

545 and

$$546 \quad E_{tot_i} = E_i + RE_i$$

547 the system to solve therefore is:

$$548 \quad R_{tot} = R + \sum_1^{54} RE_i$$

$$549 \quad E_{tot_i} = E_i + RE_i$$

$$550 \quad K_{d_i} = \frac{(R * E_i)}{RE_i}$$

551 For the set of  $i = \{1, 2, \dots, 54\}$  and can be numerically solved for  $RE_i$ . The system was solved  
552 using SciPy <sup>59</sup>.

553 The concentrations for the species in the model were taken from the supplementary data  
554 of <sup>7</sup>, in which molar concentrations were derived from high-quality proteomics data set of 29  
555 different human tissues <sup>60</sup>. The concentration of Ras proteins (HRAS, NRAS, KRAS) were  
556 pooled together and then multiplied with a loading factor to take into account the balance  
557 between active (GTP bound) and inactive (GDP bound) Ras. This loading factor was set to 0.2  
558 for a normal RAS system, and 0.9 for a system hyperactivated by an oncogenic hotspot  
559 mutation.

560 The binding affinities were taken from the predicted binding affinities (see Estimation  
561 of binding affinities), with the exception of RASSF3 for which we are not confident in our

562 structural predictions. An experimentally determined binding affinity for RASSF3 was  
563 substituted from <sup>61</sup>. Additional sets of binding affinities based on the branch pruning analysis  
564 were evaluated as well. For this, the predicted binding affinities were adapted by the  $\Delta\Delta G$  values  
565 from the branch pruning analysis. For the case that a system with hyperactivated Ras was  
566 considered, it was made sure that common oncogenic hotspots such as G12, G13 and Q61 do  
567 not influence the binding energies for any effector.

568 To gain an overview over all solved system, absolute and relative effector bindings were  
569 transformed using UMAP <sup>62</sup> and visualized. OPTICS clustering <sup>57</sup> was performed on the UMAP  
570 transformed data (parameters: min\_sample = 25, min\_cluster\_size=200).

571

## 572 **Data analysis and visualization**

573 All data analysis, unless otherwise noted was performed in R using the tidyverse environment  
574 <sup>63,64</sup>. Visualizations were generated using ggplot2 <sup>65</sup>. Visualizations of protein structures were  
575 generated using PyMol <sup>66</sup>.

576

## 577 **Figure legends**

### 578 **Figure 1. Noticeable features of the Ras-RBD interfaces**

579 (A) Overview of interface features for the Ras-RAF1 interface. Highlighted are the  
580 intramolecular  $\beta$ -sheet alignment, the assembly of the Ras interface by the switch regions and  
581 energetic hotspots in the interface.

582 (B)  $\beta$ -sheet alignment for experimentally determined complexes (MAE). A lower value  
583 indicates a more similar alignment of the intramolecular  $\beta$ -sheets compared to other crystal  
584 structures.

585 (C) FoldX alanine scan hotspots on RAS for experimentally determined complex structures.  
586 The color scale is confined to the limits [-1.6, 1.6]. Positive  $\Delta\Delta G$  values indicate a loss in  
587 binding energy upon alanine mutation, which reflects that the respective amino acid contributes  
588 to binding.

589 (D) Energetic contributions of functional regions based on alanine scan analysis.

590

### 591 **Figure 2. Overview over the homology modelling pipeline**

592 The principal homology modelling steps are shown from left to right with the steps of “Target  
593 Identification”, “Template Identification”, “Alignment Generation”, “Complex Model  
594 Generation”, “Evaluation & Selection 1”, and “Evaluation & Selection 2”. In the “Validation”  
595 process, the homology modelling pipeline is run on a set of 7 RBD domains from known x-ray

596 structures. The “Production” process describes the generation of 61 domains (RBD and  
597 Ubiquitin super-fold domains as controls).

598

### 599 **Figure 3. Energy hotspots in modelled structures**

600 (A) Heatmap of FoldX alanine scan averaged from the three representative structures on each  
601 target. The color scale is confined to the limits [-1.6, 1.6]. Hotspot residues with a  $\Delta\Delta G \geq 1.2$   
602 or  $\leq -1.2$  kcal/mol were marked. Positive and negative  $\Delta\Delta G$  values indicate a destabilization  
603 and stabilization of the RAS effector models by alanine mutation at the indicated position,  
604 respectively.

605 C-F) Local neighborhood of D38 in structures where D38 is a favorable hotspot (C: RASSF1,  
606 D: RGL3) or an unfavorable hotspot (E: ARAP2, F: RAPGEF3). Ras and the effector structures  
607 are visualized in blue and green, respectively. Polar interactions between charged amino acids  
608 are indicated with dashes.

609

### 610 **Figure 4. Results of the affinity prediction for all Ras-effector complex structures**

611 Visualization of predicted binding affinities. The three representative structures for each target  
612 are visualized as black dots, with the averaged affinity (based on averaged energy) is visualized  
613 as a red cross.

614

### 615 **Figure 5. Switch contributions for the summed-up energy contributions grouped by their 616 predicted binding affinity**

617 (A) Energy contributions were separately calculated for switch 1 switch or the rest of the Ras  
618 interface by summing up energy energies from the *in silico* alanine scan analysis. Complexes  
619 were grouped based on their predicted binding affinities into four groups.

620 (B – E) Examples of the switch contributions for each of the four groups. Visualized are BRAF  
621 (panel B), AFDN\_1 (panel C), ARHGAP20 (panel D), and PIK3C2B (panel E).

622

### 623 **Figure 6. Energetic characterization of RAS interface mutations that affect effector 624 binding**

625 The color scale is confined to the limits [-3.2, 3.2]. Hotspot residues with a  $\Delta\Delta G \geq 1$  or  $\leq -1$   
626 were marked. Negative  $\Delta\Delta G$  values indicate an increase in binding energy compared to the WT  
627 interface, and positive  $\Delta\Delta G$  values indicate a decrease in binding energy compared to the WT  
628 interface.

629

630 **Figure 7. Ras-effector interaction rewiring at a systems level**

631 (A-B) Effects of interface mutation on the Ras-effector system. Heatmap of effectors bound to  
632 Ras at 20% Ras-GTP load in 29 tissues in (panel A) WT interface and in (panel B) with the  
633 effects of a D38A mutation.

634 (C) Visualization of change in relative binding compared to WT system for each effector across  
635 all tested branch pruning mutations in all 29 tissues at 20 % or 90 % Ras-GTP load. Positive  
636 values indicate a relative increase in bound effector to Ras.

637

638 **Figure 8. Ras-effector systems are rewired into distinct states**

639 (A) UMAP transformation of all simulated systems. Similar systems were identified using  
640 OPTICS clustering. 24 identified clusters are colored in rainbow colors, with systems classified  
641 as outliers colored in grey.

642 (B) and (C) Characterization of two identified state clusters in terms of Ras-GTP load, tissues,  
643 interface mutations, and most representative effectors. For the tissue and mutation pie charts,  
644 all groups that were smaller than 5% of the total observations were collapsed into the “Other”  
645 group.



646

- 647 1. Gasper, R., and Wittinghofer, F. (2019). The Ras switch in structural and historical  
648 perspective. *Biol Chem* 401, 143-163. 10.1515/hsz-2019-0330.
- 649 2. Pai, E.F., Kabsch, W., Krengel, U., Holmes, K.C., John, J., and Wittinghofer, A. (1989). Structure  
650 of the guanine-nucleotide-binding domain of the Ha-ras oncogene product p21 in the  
651 triphosphate conformation. *Nature* 341, 209-214. 10.1038/341209a0.
- 652 3. Pai, E.F., Krengel, U., Petsko, G.A., Goody, R.S., Kabsch, W., and Wittinghofer, A. (1990).  
653 Refined crystal structure of the triphosphate conformation of H-ras p21 at 1.35 Å resolution:  
654 implications for the mechanism of GTP hydrolysis. *Embo j* 9, 2351-2359. 10.1002/j.1460-  
655 2075.1990.tb07409.x.
- 656 4. Kiel, C., and Serrano, L. (2006). The ubiquitin domain superfold: structure-based sequence  
657 alignments and characterization of binding epitopes. *J Mol Biol* 355, 821-844.  
658 10.1016/j.jmb.2005.10.010.
- 659 5. Simanshu, D.K., Nissley, D.V., and McCormick, F. (2017). RAS Proteins and Their Regulators in  
660 Human Disease. *Cell* 170, 17-33. 10.1016/j.cell.2017.06.009.
- 661 6. Ibáñez Gaspar, V., Catozzi, S., Ternet, C., Luthert, P.J., and Kiel, C. (2021). Analysis of Ras-  
662 effector interaction competition in large intestine and colorectal cancer context. *Small*  
663 *GTPases* 12, 209-225. 10.1080/21541248.2020.1724596.
- 664 7. Catozzi, S., Halasz, M., and Kiel, C. (2021). Predicted 'wiring landscape' of Ras-effector  
665 interactions in 29 human tissues. *NPJ Syst Biol Appl* 7, 10. 10.1038/s41540-021-00170-0.
- 666 8. Kiel, C., Matallanas, D., and Kolch, W. (2021). The Ins and Outs of RAS Effector Complexes.  
667 *Biomolecules* 11. 10.3390/biom11020236.
- 668 9. Catozzi, S., Ternet, C., Gourrege, A., Wynne, K., Oliviero, G., and Kiel, C. (2022).  
669 Reconstruction and analysis of a large-scale binary Ras-effector signaling network. *Cell*  
670 *Commun Signal* 20, 24. 10.1186/s12964-022-00823-5.
- 671 10. Kiel, C., Verschueren, E., Yang, J.S., and Serrano, L. (2013). Integration of protein abundance  
672 and structure data reveals competition in the ErbB signaling network. *Sci Signal* 6, ra109.  
673 10.1126/scisignal.2004560.
- 674 11. Kholodenko, B.N., Hoek, J.B., and Westerhoff, H.V. (2000). Why cytoplasmic signalling  
675 proteins should be recruited to cell membranes. *Trends Cell Biol* 10, 173-178.  
676 10.1016/s0962-8924(00)01741-4.
- 677 12. Kiel, C., Foglierini, M., Kuemmerer, N., Beltrao, P., and Serrano, L. (2007). A genome-wide  
678 Ras-effector interaction network. *J Mol Biol* 370, 1020-1032. 10.1016/j.jmb.2007.05.015.
- 679 13. Kiel, C., and Serrano, L. (2007). Prediction of Ras-effector interactions using position energy  
680 matrices. *Bioinformatics* 23, 2226-2230. 10.1093/bioinformatics/btm336.
- 681 14. Jumper, J., Evans, R., Pritzel, A., Green, T., Figurnov, M., Ronneberger, O., Tunyasuvunakool,  
682 K., Bates, R., Žídek, A., Potapenko, A., et al. (2021). Highly accurate protein structure  
683 prediction with AlphaFold. *Nature* 596, 583-589. 10.1038/s41586-021-03819-2.
- 684 15. Varadi, M., Anyango, S., Deshpande, M., Nair, S., Natassia, C., Yordanova, G., Yuan, D., Stroe,  
685 O., Wood, G., Laydon, A., et al. (2022). AlphaFold Protein Structure Database: massively  
686 expanding the structural coverage of protein-sequence space with high-accuracy models.  
687 *Nucleic Acids Res* 50, D439-d444. 10.1093/nar/gkab1061.
- 688 16. Gimple, R.C., and Wang, X. (2019). RAS: Striking at the Core of the Oncogenic Circuitry. *Front*  
689 *Oncol* 9, 965. 10.3389/fonc.2019.00965.
- 690 17. Moore, A.R., Rosenberg, S.C., McCormick, F., and Malek, S. (2020). RAS-targeted therapies: is  
691 the undruggable drugged? *Nat Rev Drug Discov* 19, 533-552. 10.1038/s41573-020-0068-6.
- 692 18. Stephen, A.G., Esposito, D., Bagni, R.K., and McCormick, F. (2014). Dragging ras back in the  
693 ring. *Cancer Cell* 25, 272-281. 10.1016/j.ccr.2014.02.017.
- 694 19. Zhong, Q., Simonis, N., Li, Q.R., Charleatoux, B., Heuze, F., Klitgord, N., Tam, S., Yu, H.,  
695 Venkatesan, K., Mou, D., et al. (2009). Edgetic perturbation models of human inherited  
696 disorders. *Mol Syst Biol* 5, 321. 10.1038/msb.2009.80.

- 697 20. Kiel, C., and Serrano, L. (2014). Structure-energy-based predictions and network modelling of  
698 RASopathy and cancer missense mutations. *Mol Syst Biol* 10, 727. 10.1002/msb.20145092.
- 699 21. Junk, P., and Kiel, C. (2021). Engineering of Biological Pathways: Complex Formation and  
700 Signal Transduction. *Methods Mol Biol* 2315, 59-70. 10.1007/978-1-0716-1468-6\_4.
- 701 22. Junk, P., and Kiel, C. (2021). HOMELETTE: a unified interface to homology modelling  
702 software. *Bioinformatics* 38, 1749-1751. 10.1093/bioinformatics/btab866.
- 703 23. Sali, A., and Blundell, T.L. (1993). Comparative protein modelling by satisfaction of spatial  
704 restraints. *J Mol Biol* 234, 779-815. 10.1006/jmbi.1993.1626.
- 705 24. Webb, B., and Sali, A. (2016). Comparative Protein Structure Modeling Using MODELLER. *Curr*  
706 *Protoc Bioinformatics* 54, 5.6.1-5.6.37. 10.1002/cpbi.3.
- 707 25. Janson, G., Grottesi, A., Pietrosanto, M., Ausiello, G., Guarguaglini, G., and Paiardini, A.  
708 (2019). Revisiting the "satisfaction of spatial restraints" approach of MODELLER for protein  
709 homology modeling. *PLoS Comput Biol* 15, e1007219. 10.1371/journal.pcbi.1007219.
- 710 26. Benkert, P., Tosatto, S.C., and Schomburg, D. (2008). QMEAN: A comprehensive scoring  
711 function for model quality assessment. *Proteins* 71, 261-277. 10.1002/prot.21715.
- 712 27. Chen, V.B., Arendall, W.B., 3rd, Headd, J.J., Keedy, D.A., Immormino, R.M., Kapral, G.J.,  
713 Murray, L.W., Richardson, J.S., and Richardson, D.C. (2010). MolProbity: all-atom structure  
714 validation for macromolecular crystallography. *Acta Crystallogr D Biol Crystallogr* 66, 12-21.  
715 10.1107/s0907444909042073.
- 716 28. Williams, C.J., Headd, J.J., Moriarty, N.W., Prisant, M.G., Videau, L.L., Deis, L.N., Verma, V.,  
717 Keedy, D.A., Hintze, B.J., Chen, V.B., et al. (2018). MolProbity: More and better reference  
718 data for improved all-atom structure validation. *Protein Sci* 27, 293-315. 10.1002/pro.3330.
- 719 29. Dong, G.Q., Fan, H., Schneidman-Duhovny, D., Webb, B., and Sali, A. (2013). Optimized  
720 atomic statistical potentials: assessment of protein interfaces and loops. *Bioinformatics* 29,  
721 3158-3166. 10.1093/bioinformatics/btt560.
- 722 30. Jarmoskaite, I., AlSadhan, I., Vaidyanathan, P.P., and Herschlag, D. (2020). How to measure  
723 and evaluate binding affinities. *Elife* 9. 10.7554/eLife.57264.
- 724 31. Schymkowitz, J., Borg, J., Stricher, F., Nys, R., Rousseau, F., and Serrano, L. (2005). The FoldX  
725 web server: an online force field. *Nucleic Acids Res* 33, W382-388. 10.1093/nar/gki387.
- 726 32. Humphreys, I.R., Pei, J., Baek, M., Krishnakumar, A., Anishchenko, I., Ovchinnikov, S., Zhang,  
727 J., Ness, T.J., Banjade, S., Bagde, S.R., et al. (2021). Computed structures of core eukaryotic  
728 protein complexes. *Science* 374, eabm4805. 10.1126/science.abm4805.
- 729 33. Citalán-Madrid, A.F., García-Ponce, A., Vargas-Robles, H., Betanzos, A., and Schnoor, M.  
730 (2013). Small GTPases of the Ras superfamily regulate intestinal epithelial homeostasis and  
731 barrier function via common and unique mechanisms. *Tissue Barriers* 1, e26938.  
732 10.4161/tisb.26938.
- 733 34. Martin, T.A., and Jiang, W.G. (2009). Loss of tight junction barrier function and its role in  
734 cancer metastasis. *Biochim Biophys Acta* 1788, 872-891. 10.1016/j.bbamem.2008.11.005.
- 735 35. Choi, B.H., Kou, Z., Colon, T.M., Chen, C.H., Chen, Y., and Dai, W. (2021). Identification of  
736 Radil as a Ras binding partner and putative activator. *J Biol Chem* 296, 100314.  
737 10.1016/j.jbc.2021.100314.
- 738 36. Zimmerman, S.P., Hueschen, C.L., Malide, D., Milgram, S.L., and Playford, M.P. (2013). Sorting  
739 nexin 27 (SNX27) associates with zonula occludens-2 (ZO-2) and modulates the epithelial  
740 tight junction. *Biochem J* 455, 95-106. 10.1042/bj20121755.
- 741 37. Zhou, X.H., Yang, C.Q., Zhang, C.L., Gao, Y., Yuan, H.B., and Wang, C. (2014). RASSF5 inhibits  
742 growth and invasion and induces apoptosis in osteosarcoma cells through activation of  
743 MST1/LATS1 signaling. *Oncol Rep* 32, 1505-1512. 10.3892/or.2014.3387.
- 744 38. Rodrigues, J., Teixeira, J.M.C., Trellet, M., and Bonvin, A. (2018). pdb-tools: a swiss army knife  
745 for molecular structures. *F1000Res* 7, 1961. 10.12688/f1000research.17456.1.
- 746 39. Guerois, R., Nielsen, J.E., and Serrano, L. (2002). Predicting changes in the stability of proteins  
747 and protein complexes: a study of more than 1000 mutations. *J Mol Biol* 320, 369-387.  
748 10.1016/s0022-2836(02)00442-4.

- 749 40. Kiel, C., Serrano, L., and Herrmann, C. (2004). A detailed thermodynamic analysis of  
750 ras/effector complex interfaces. *J Mol Biol* *340*, 1039-1058. [10.1016/j.jmb.2004.05.050](https://doi.org/10.1016/j.jmb.2004.05.050).
- 751 41. Kiel, C., and Serrano, L. (2009). Cell type-specific importance of ras-c-raf complex association  
752 rate constants for MAPK signaling. *Sci Signal* *2*, ra38. [10.1126/scisignal.2000397](https://doi.org/10.1126/scisignal.2000397).
- 753 42. Vetter, I.R., and Wittinghofer, A. (2001). The guanine nucleotide-binding switch in three  
754 dimensions. *Science* *294*, 1299-1304. [10.1126/science.1062023](https://doi.org/10.1126/science.1062023).
- 755 43. Zhang, Y., and Skolnick, J. (2005). TM-align: a protein structure alignment algorithm based on  
756 the TM-score. *Nucleic Acids Res* *33*, 2302-2309. [10.1093/nar/gki524](https://doi.org/10.1093/nar/gki524).
- 757 44. Mistry, J., Chuguransky, S., Williams, L., Qureshi, M., Salazar, G.A., Sonnhammer, E.L.L.,  
758 Tosatto, S.C.E., Paladin, L., Raj, S., Richardson, L.J., et al. (2021). Pfam: The protein families  
759 database in 2021. *Nucleic Acids Res* *49*, D412-d419. [10.1093/nar/gkaa913](https://doi.org/10.1093/nar/gkaa913).
- 760 45. UniProt, C. (2021). UniProt: the universal protein knowledgebase in 2021. *Nucleic Acids Res*  
761 *49*, D480-D489. [10.1093/nar/gkaa1100](https://doi.org/10.1093/nar/gkaa1100).
- 762 46. Mirdita, M., Schütze, K., Moriwaki, Y., Heo, L., Ovchinnikov, S., and Steinegger, M. (2022).  
763 ColabFold: making protein folding accessible to all. *Nat Methods* *19*, 679-682.  
764 [10.1038/s41592-022-01488-1](https://doi.org/10.1038/s41592-022-01488-1).
- 765 47. Evans, R., O'Neill, M., Pritzel, A., Antropova, N., Senior, A., Green, T., Žídek, A., Bates, R.,  
766 Blackwell, S., Yim, J., et al. (2022). Protein complex prediction with AlphaFold-Multimer.  
767 *bioRxiv*. [10.1101/2021.10.04.463034](https://doi.org/10.1101/2021.10.04.463034).
- 768 48. Mirdita, M., Steinegger, M., and Söding, J. (2019). MMseqs2 desktop and local web server  
769 app for fast, interactive sequence searches. *Bioinformatics* *35*, 2856-2858.  
770 [10.1093/bioinformatics/bty1057](https://doi.org/10.1093/bioinformatics/bty1057).
- 771 49. Mirdita, M., von den Driesch, L., Galiez, C., Martin, M.J., Söding, J., and Steinegger, M. (2017).  
772 Uniclust databases of clustered and deeply annotated protein sequences and alignments.  
773 *Nucleic Acids Res* *45*, D170-d176. [10.1093/nar/gkw1081](https://doi.org/10.1093/nar/gkw1081).
- 774 50. Mitchell, A.L., Almeida, A., Beracochea, M., Boland, M., Burgin, J., Cochrane, G., Crusoe, M.R.,  
775 Kale, V., Potter, S.C., Richardson, L.J., et al. (2020). MGnify: the microbiome analysis resource  
776 in 2020. *Nucleic Acids Res* *48*, D570-d578. [10.1093/nar/gkz1035](https://doi.org/10.1093/nar/gkz1035).
- 777 51. Steinegger, M., Meier, M., Mirdita, M., Vöhringer, H., Haunsberger, S.J., and Söding, J. (2019).  
778 HH-suite3 for fast remote homology detection and deep protein annotation. *BMC*  
779 *Bioinformatics* *20*, 473. [10.1186/s12859-019-3019-7](https://doi.org/10.1186/s12859-019-3019-7).
- 780 52. Berman, H., Henrick, K., and Nakamura, H. (2003). Announcing the worldwide Protein Data  
781 Bank. *Nat Struct Biol* *10*, 980. [10.1038/nsb1203-980](https://doi.org/10.1038/nsb1203-980).
- 782 53. Eastman, P., Swails, J., Chodera, J.D., McGibbon, R.T., Zhao, Y., Beauchamp, K.A., Wang, L.P.,  
783 Simmonett, A.C., Harrigan, M.P., Stern, C.D., et al. (2017). OpenMM 7: Rapid development of  
784 high performance algorithms for molecular dynamics. *PLoS Comput Biol* *13*, e1005659.  
785 [10.1371/journal.pcbi.1005659](https://doi.org/10.1371/journal.pcbi.1005659).
- 786 54. Notredame, C., Higgins, D.G., and Heringa, J. (2000). T-Coffee: A novel method for fast and  
787 accurate multiple sequence alignment. *J Mol Biol* *302*, 205-217. [10.1006/jmbi.2000.4042](https://doi.org/10.1006/jmbi.2000.4042).
- 788 55. Wallace, I.M., O'Sullivan, O., Higgins, D.G., and Notredame, C. (2006). M-Coffee: combining  
789 multiple sequence alignment methods with T-Coffee. *Nucleic Acids Res* *34*, 1692-1699.  
790 [10.1093/nar/gkl091](https://doi.org/10.1093/nar/gkl091).
- 791 56. Benkert, P., Biasini, M., and Schwede, T. (2011). Toward the estimation of the absolute  
792 quality of individual protein structure models. *Bioinformatics* *27*, 343-350.  
793 [10.1093/bioinformatics/btq662](https://doi.org/10.1093/bioinformatics/btq662).
- 794 57. Ankerst, M., Breunig, M.M., Kriegel, H.-P., and Sander, J. (1999). Optics. *ACM SIGMOD*  
795 *Record* *28*, 49-60. [10.1145/304181.304187](https://doi.org/10.1145/304181.304187).
- 796 58. Pedregosa, F., Varoquaux, G., Gramfort, A., Michel, V., Thirion, B., Grisel, O., Blondel, M.,  
797 Prettenhofer, P., Weiss, R., Dubourg, V., et al. (2011). Scikit-Learn: Machine Learning in  
798 Python. *J. Mach. Learn. Res.* *12*, 2825–2830.

- 799 59. Virtanen, P., Gommers, R., Oliphant, T.E., Haberland, M., Reddy, T., Cournapeau, D., Burovski,  
800 E., Peterson, P., Weckesser, W., Bright, J., et al. (2020). SciPy 1.0: fundamental algorithms for  
801 scientific computing in Python. *Nat Methods* *17*, 261-272. 10.1038/s41592-019-0686-2.
- 802 60. Wang, D., Eraslan, B., Wieland, T., Hallström, B., Hopf, T., Zolg, D.P., Zecha, J., Asplund, A., Li,  
803 L.H., Meng, C., et al. (2019). A deep proteome and transcriptome abundance atlas of 29  
804 healthy human tissues. *Mol Syst Biol* *15*, e8503. 10.15252/msb.20188503.
- 805 61. Rezaei Adariani, S., Kazeminejad, N.S., Bazgir, F., Wittich, C., Amin, E., Seidel, C.A.M.,  
806 Dvorsky, R., and Ahmadian, M.R. (2021). A comprehensive analysis of RAS-effector  
807 interactions reveals interaction hotspots and new binding partners. *J Biol Chem* *296*, 100626.  
808 10.1016/j.jbc.2021.100626.
- 809 62. Dorrity, M.W., Saunders, L.M., Queitsch, C., Fields, S., and Trapnell, C. (2020). Dimensionality  
810 reduction by UMAP to visualize physical and genetic interactions. *Nat Commun* *11*, 1537.  
811 10.1038/s41467-020-15351-4.
- 812 63. Team, R.C. (2022). R: A Language and Environment for Statistical Computing (R Foundation  
813 for Statistical Computing).
- 814 64. Wickham, H., Averick, M., Bryan, J., Chang, W., McGowan, L., François, R., Grolemund, G.,  
815 Hayes, A., Henry, L., Hester, J., et al. (2019). Welcome to the Tidyverse. *Journal of Open*  
816 *Source Software* *4*. 10.21105/joss.01686.
- 817 65. Wickham, H. (2016). *ggplot2: Elegant Graphics for Data Analysis* (Springer-Verlag).
- 818 66. Schrodinger, LLC (2022). The PyMOL Molecular Graphics System, Version 2.5.

819

Figure 1

A

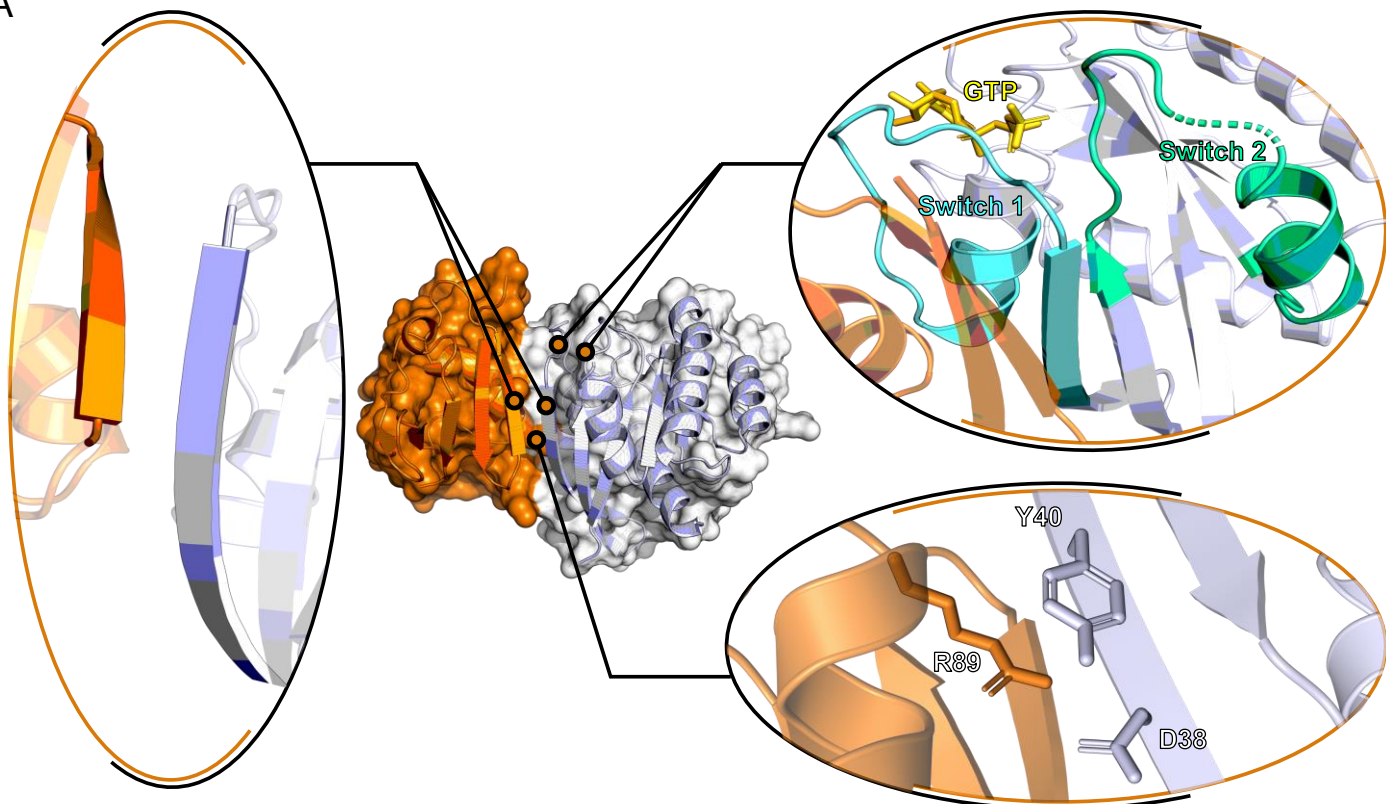

B

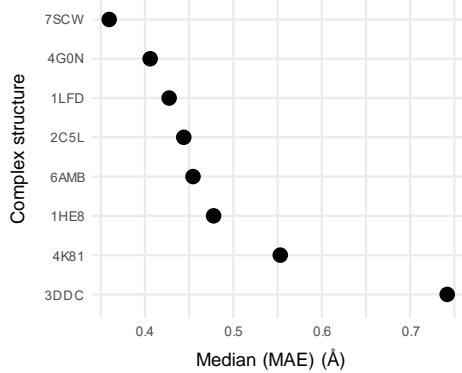

C

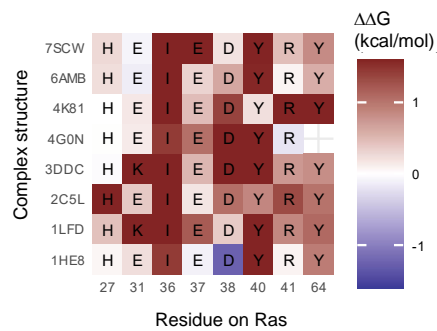

D

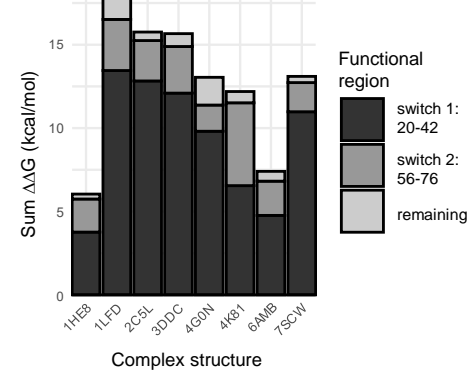

Figure 2

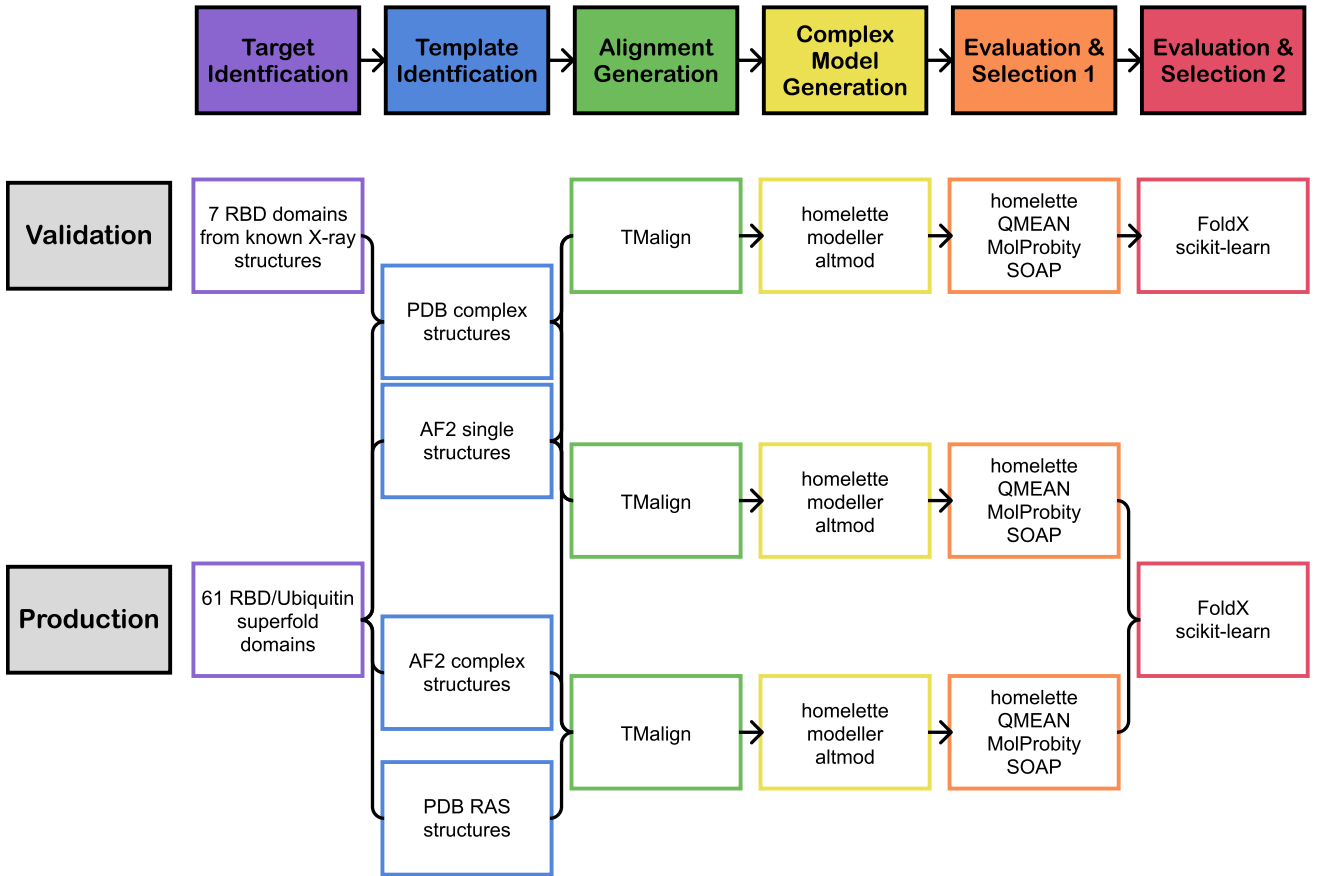



Figure 3

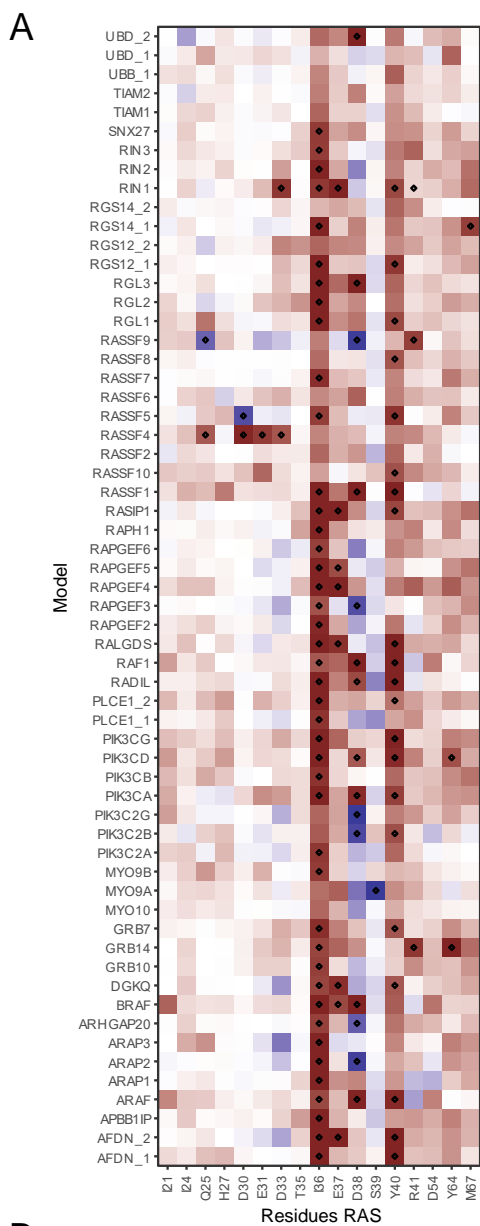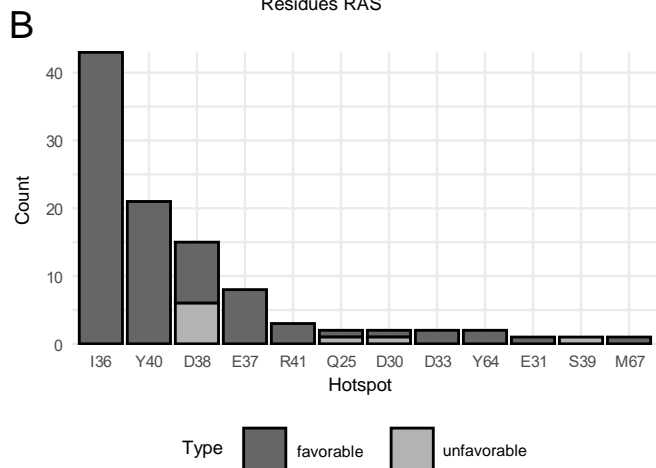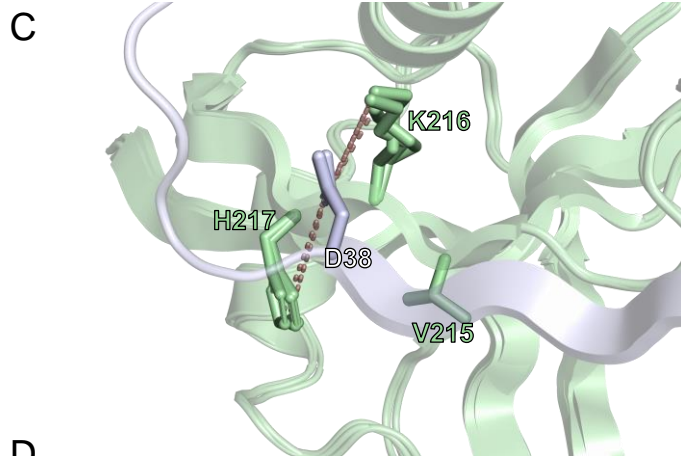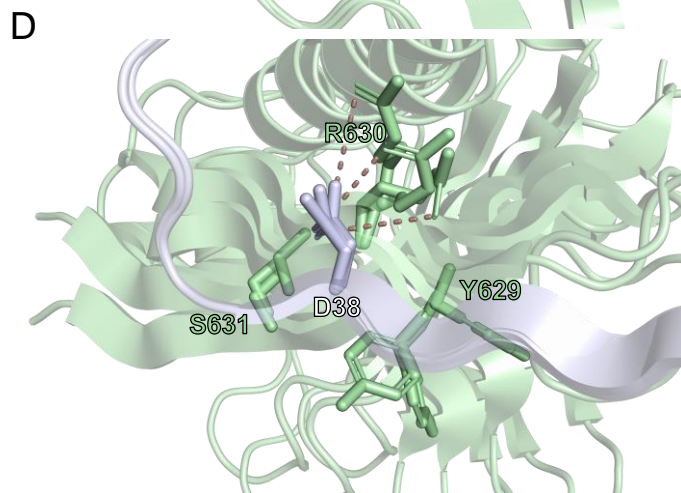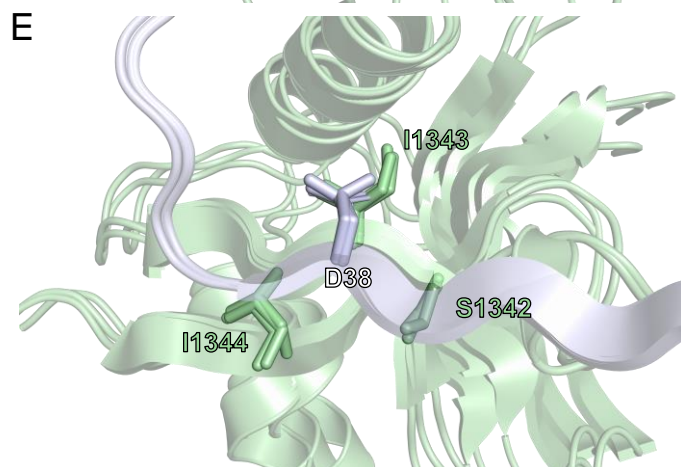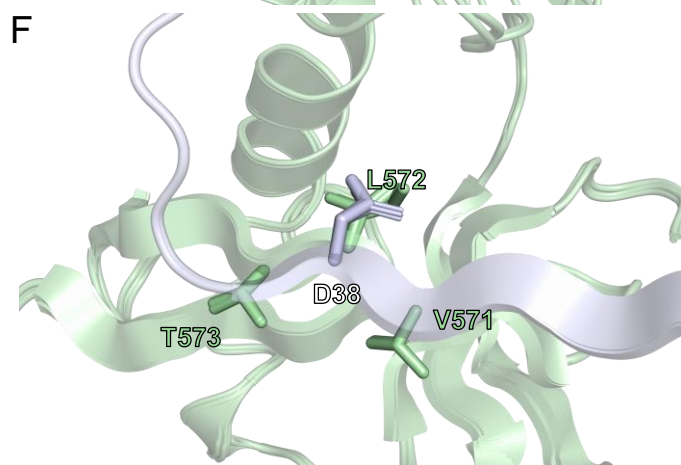

Figure 4

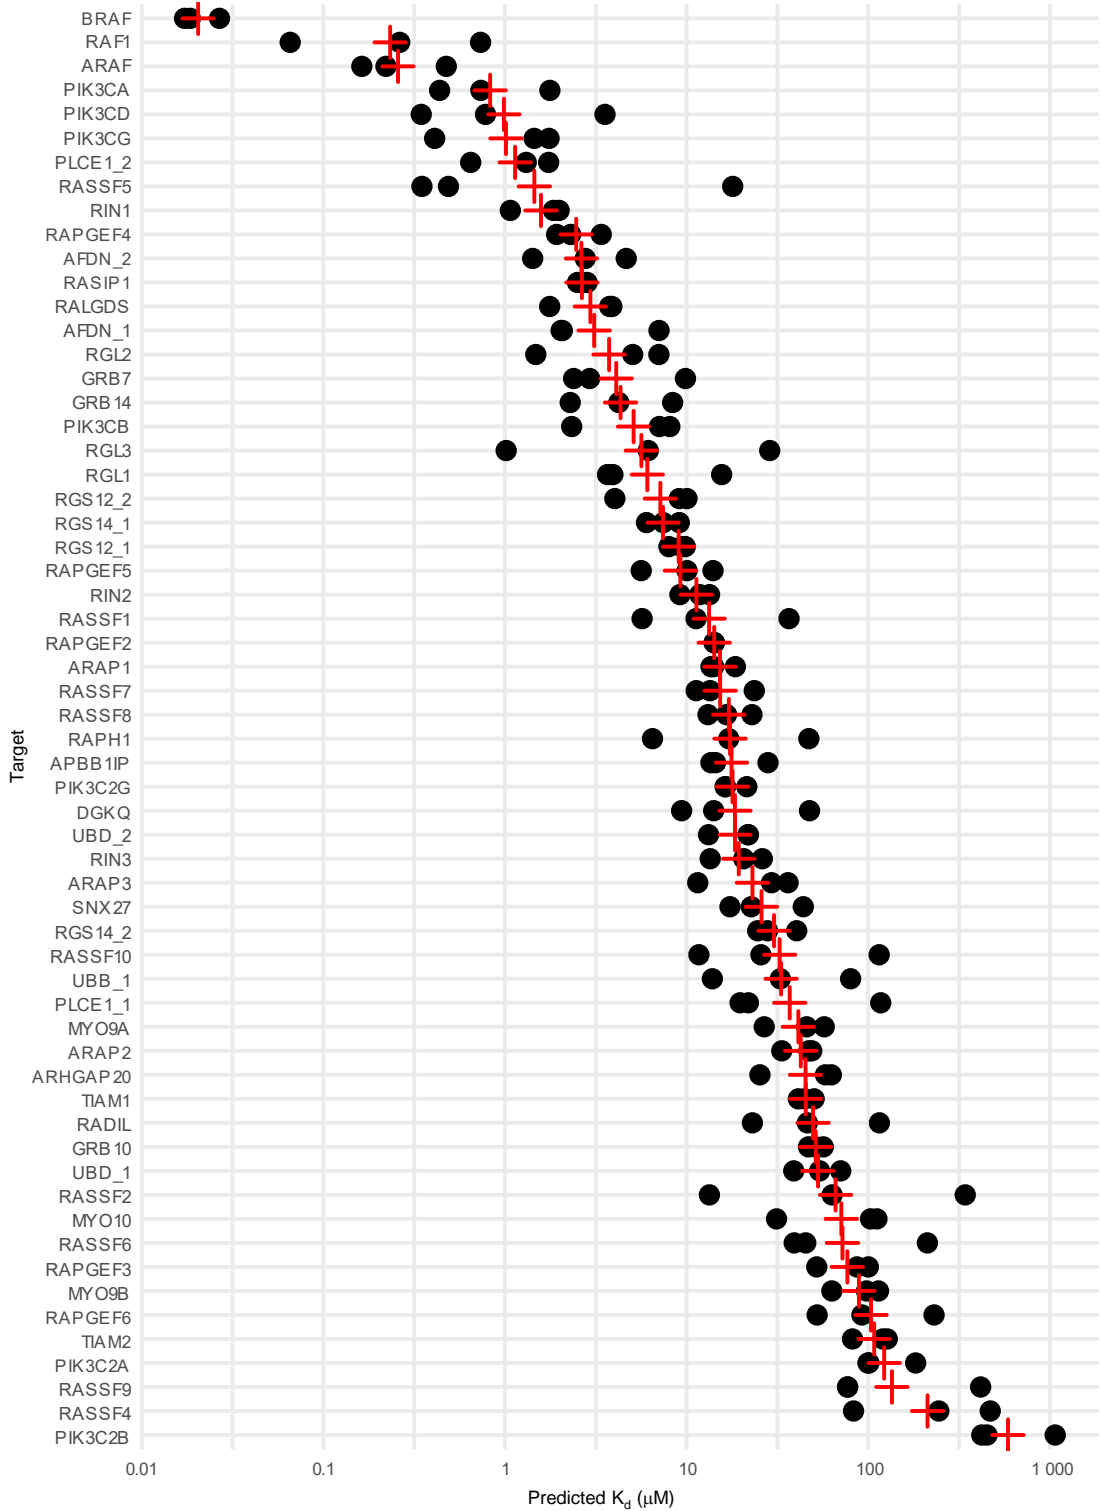

Figure 5

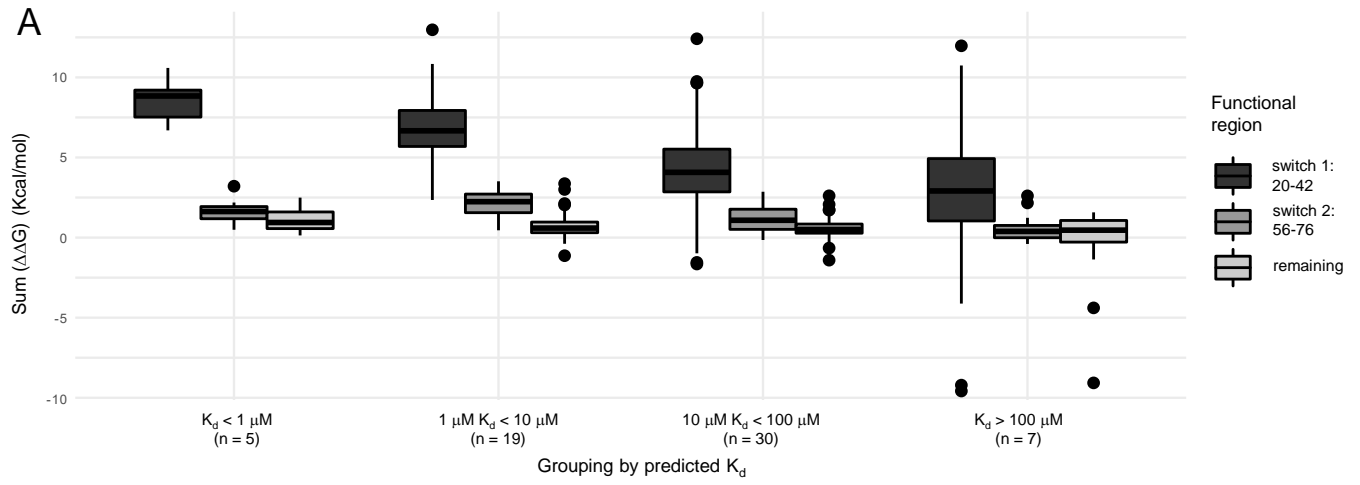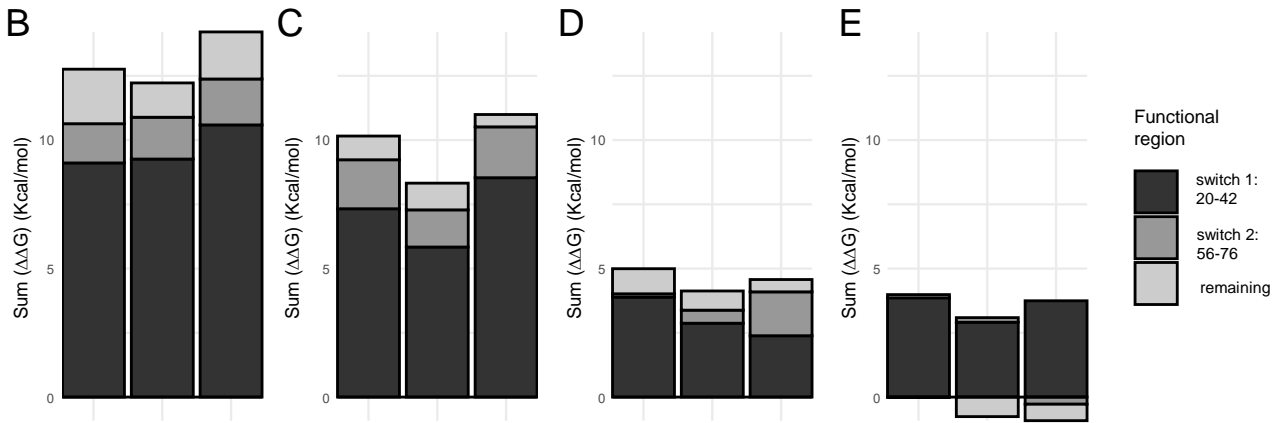

Figure 6

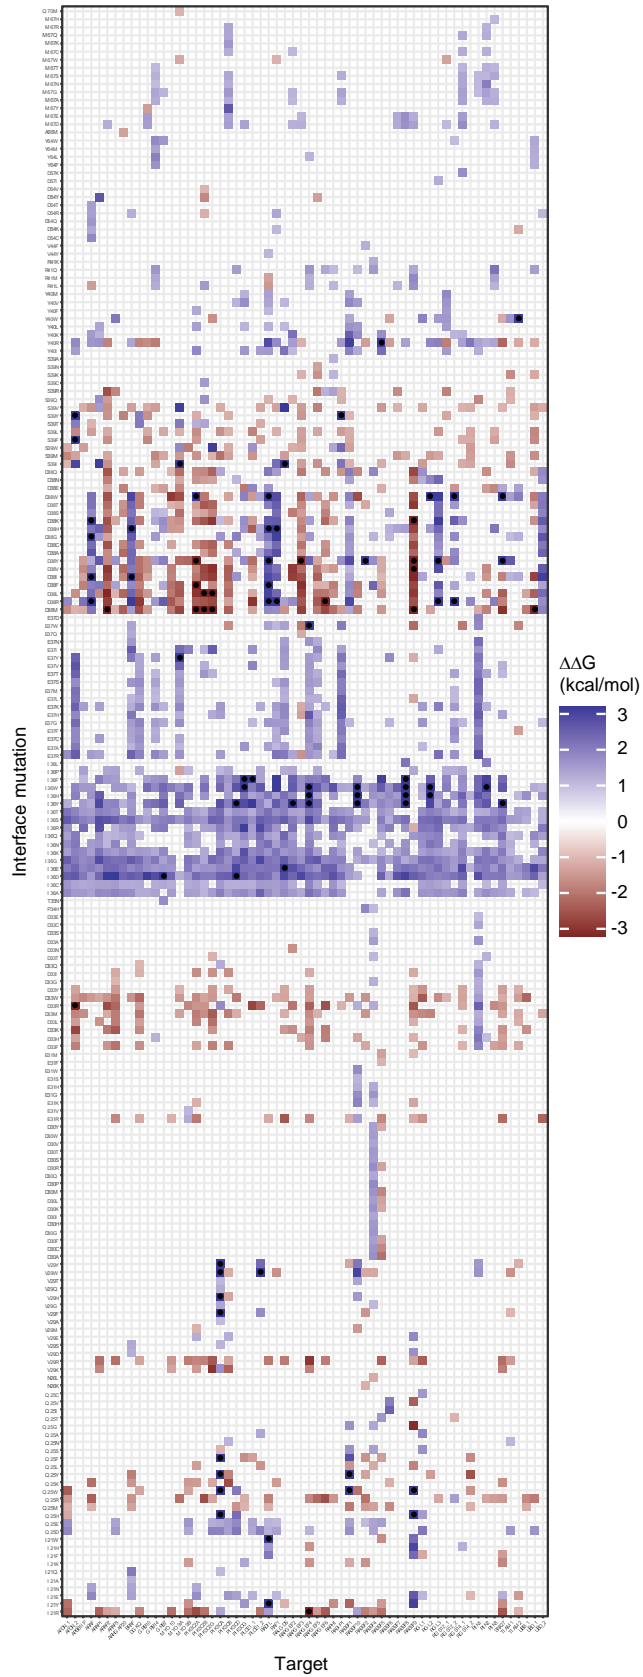

Target

Figure 7

A

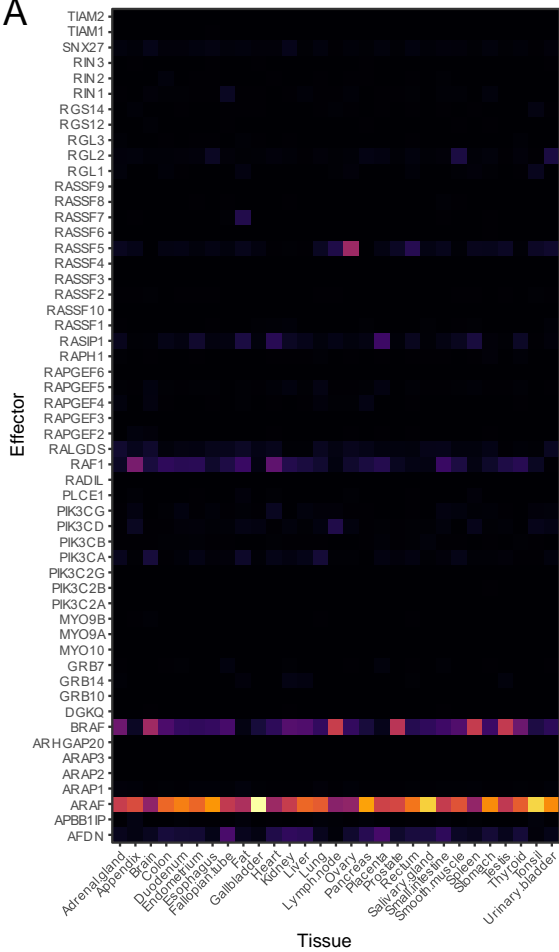

B

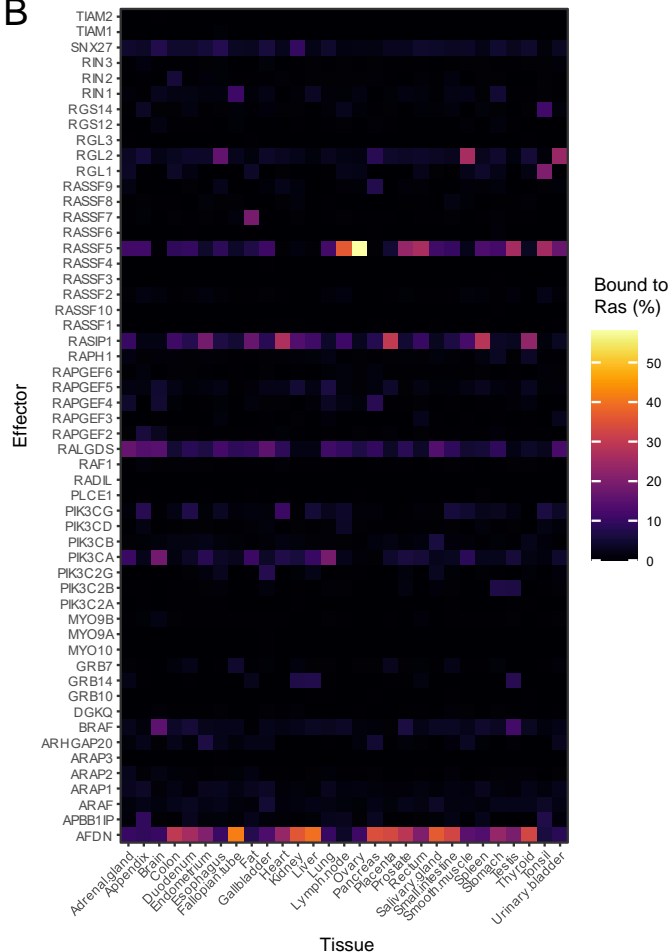

C

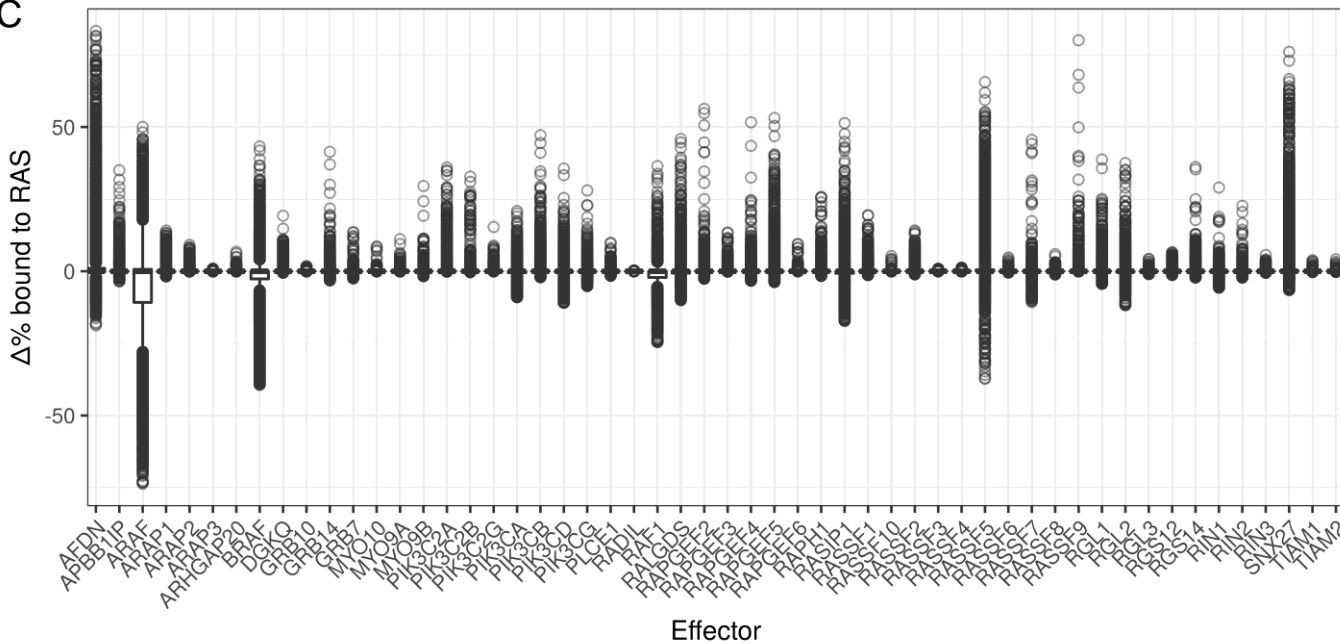

Figure 8

A

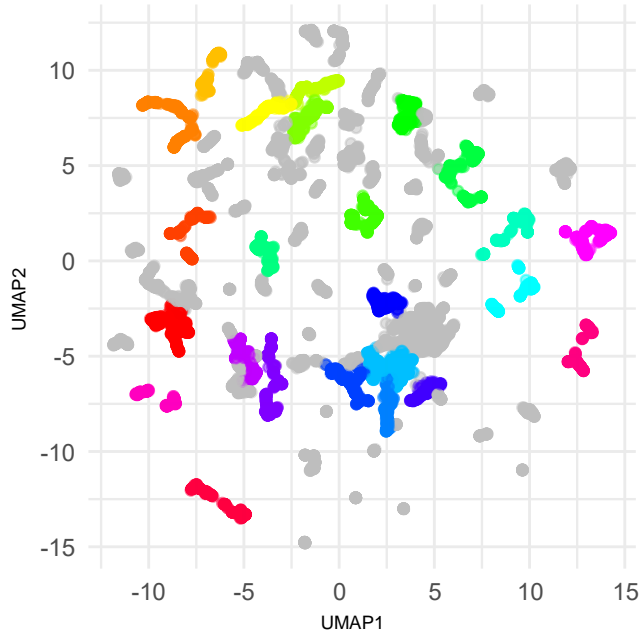

B

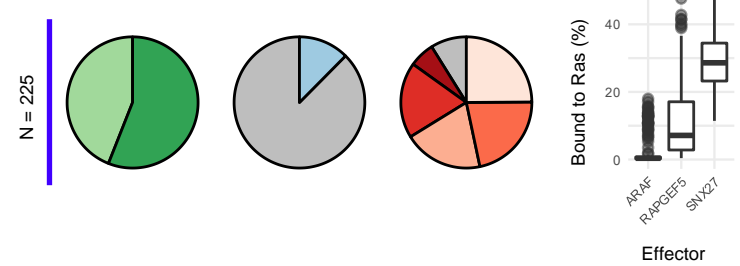

C

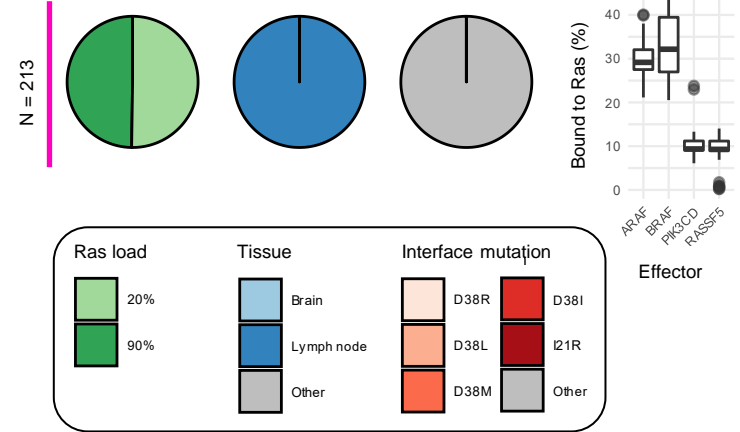

Source: https://www.biorxiv.org/content/10.1101/2022.09.04.506480.full.pdf
